# Supplementary material
Source: MDPI journal article supplement (https://www.mdpi.com/1999-4907/12/11/1474)
Supplement: s1 [file s1 › forests-1416509-supplementary.pdf]

## Supplementary Materials

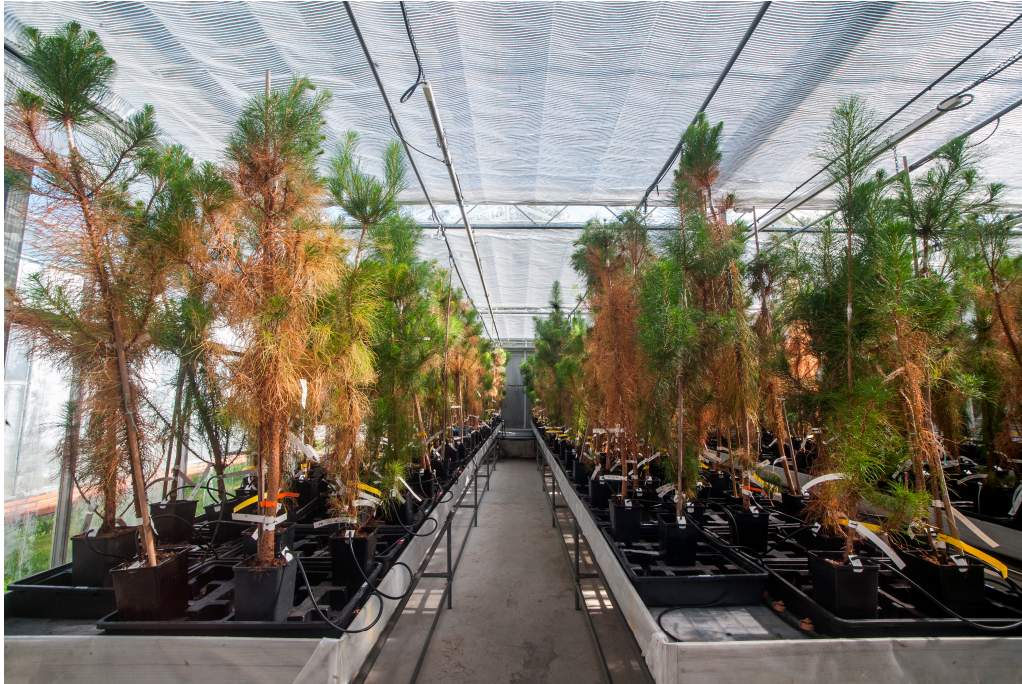

Figure S1: *Pinus radiata* experiment one month after inoculation with *Bursaphelenchus xylophilus*.
